# Supplementary material for: Patterns of recent natural selection on genetic loci associated with sexually differentiated human body size and shape phenotypes
Source: PLoS Genet. 2021 Jun 3;17(6):e1009562. doi: 10.1371/journal.pgen.1009562 (PMC8174730; doi:10.1371/journal.pgen.1009562)
Supplement: S3 Table — aNumber of pruned SexDiff-associated SNPs at an FDR threshold of 0.001 bMean log2 ratio of female trait effect size to the male trait effect size cOne-sided t-test P-value comparing distribution of the log2(ratio) dPermutation P-value of the probability that the mean log2(ratio) could be observed by chance when compared to phenotype-associated SNPs. (DOCX) [file pgen.1009562.s005.docx]

**S3 Table:** Observed log2 ratio of female to male beta values and p-values for each set of Female SexDiff-associated SNPs

| Phenotype | #SNPsa | Mean  log2(ratio)b | P-value to zeroc | FDR to zero | P-value to phenotype-associated SNPsd | FDR to phenotype-associated SNPs |
| --- | --- | --- | --- | --- | --- | --- |
| Height | 21 | 2.5244 | 4.8x10-10 | 4.8x10-9 | <0.001 | 0.001 |
| Body mass | 11 | 2.7726 | 9.8x10-7 | 1.6x10-6 | <0.001 | 0.001 |
| Hip circumference | 13 | 3.2853 | 1.9x10-6 | 2.7x10-6 | <0.001 | 0.001 |
| Body fat percentage | 9 | 3.2393 | 3.3x10-5 | 3.3x10-5 | <0.001 | 0.001 |
| Waist circumference | 14 | 3.3511 | 5.1x10-6 | 6.4x10-6 | <0.001 | 0.001 |

aNumber of pruned SexDiff-associated SNPs at an FDR threshold of 0.001 bMean log2 ratio of female trait effect size to the male trait effect size cOne-sided t-test P-value comparing distribution of the log2(ratio) dPermutation P-value of the probability that the mean log2(ratio) could be observed by chance when compared to phenotype-associated SNPs
